# Supplementary material
Source: Springer Nature journal article supplement (https://www.springermedizin.de/resource/supplementary/12990_2008_124_MOESM1_ESM.pdf/9612750)
Supplement: MOESM1 [file 9612750]

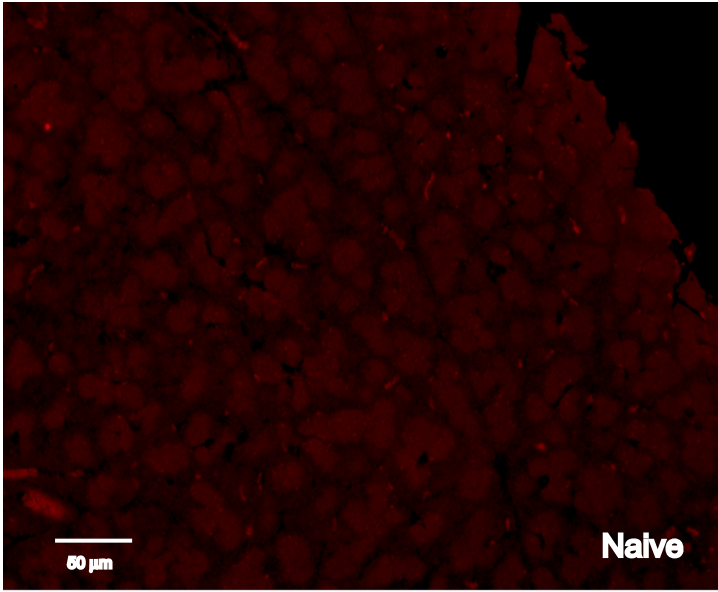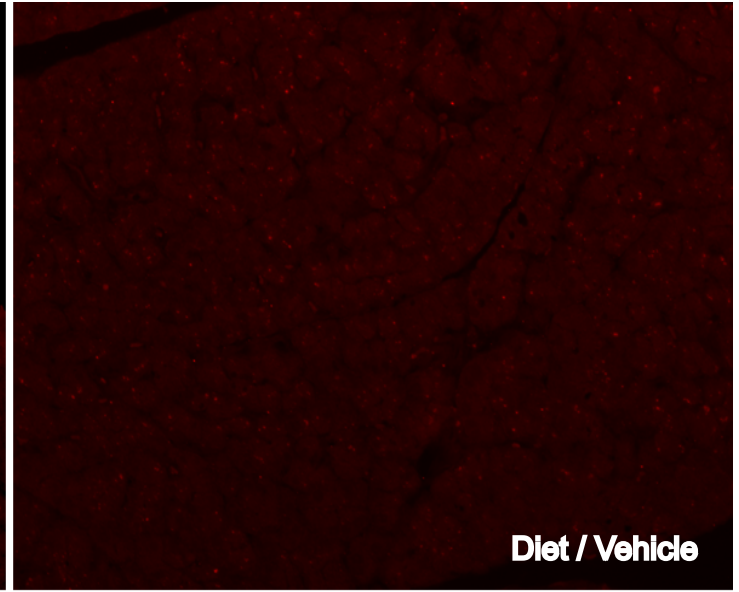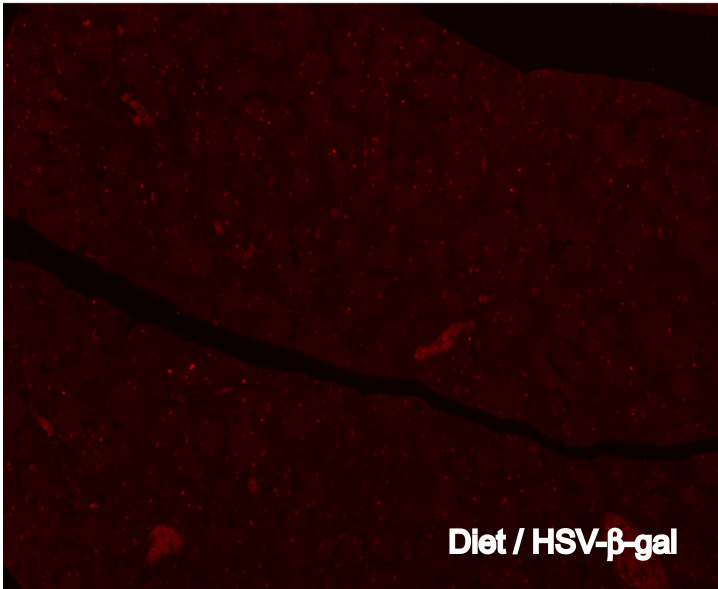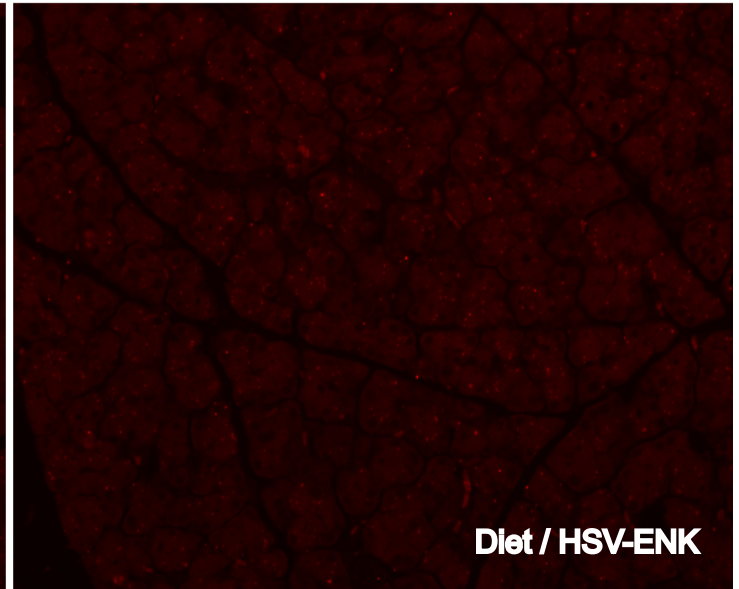

## HSV-1 in Pancreas
